# Supplementary material for: Virtual Versus Light Microscopy Usage among Students: A Systematic Review and Meta-Analytic Evidence in Medical Education
Source: MDPI journal article supplement (doi:10.3390/diagnostics13030558), 2023-02-02
Supplement: s1 [file s1]

Supplementary Table S1: Themes depicting advantages/disadvantages of VM in comparison to LM

| Themes     |                                       |                                                                                       | References                                             |
|------------|---------------------------------------|---------------------------------------------------------------------------------------|--------------------------------------------------------|
| Advantages | Ease of use                           | Availability of free online resources                                                 | 31, 36, 38, 42, 43, 20                                 |
|            |                                       | Accessibility to slides outside of the classroom                                      | 35, 44, 47, 48, 49, 52, 53, 54, 59, 64, 67             |
|            |                                       | Efficiency and feasibility                                                            | 34, 40, 41, 44, 48, 54, 20, 67                         |
|            |                                       | Better image quality, no loss of quality/slides over time                             | 34, 35, 36, 42, 47, 53, 58, 60, 67                     |
|            |                                       | Ability to annotate slides                                                            | 35, 20                                                 |
|            | Improved collaboration                | Improved student faculty rapport and collaboration                                    | 33, 34, 42, 45, 51, 52, 56, 60                         |
|            |                                       | Better cooperation and participation amongst students                                 | 31, 32, 33, 34, 36, 43, 52, 57, 60, 61, 20, 66, 67     |
|            | Exam preparation                      | Better time management                                                                | 32, 52                                                 |
|            |                                       | Better source for exam preparation                                                    | 32, 38, 56                                             |
|            |                                       | Higher student confidence/satisfaction                                                | 32, 38, 53                                             |
|            |                                       | Promotion of self-directed learning                                                   | 31, 35, 38, 41, 48, 58, 59, 64                         |
|            | Academic performance                  | USMLE scores correlation                                                              | 61                                                     |
|            |                                       | Significantly improved academic test scores                                           | 31, 32, 36, 37, 38, 46, 48, 50, 52, 53, 58, 62, 63, 20 |
|            |                                       | Better for remote/online learning                                                     | 32, 40, 41                                             |
|            |                                       | Improved medical knowledge of the subject                                             | 34, 38, 44, 45, 46, 48, 22, 55, 58, 61, 63, 64, 67     |
|            |                                       | Improved diagnostic and practical skill development during laboratory sessions        | 33, 39, 48, 53, 56, 5, 60, 67                          |
|            |                                       | Improved class attendance                                                             | 47, 48, 54                                             |
|            | Faculty impact                        | Higher level of Faculty/teacher satisfaction                                          | 35, 42, 57, 59, 20                                     |
|            |                                       | Cost effectiveness/ time effectiveness                                                | 31, 32, 33, 35, 36, 42, 57, 20, 67                     |
|            | Student perceptions and acceptability | Overall positive acceptance for VM/ higher student satisfaction for VM based teaching | 36, 37, 39, 41, 47 49, 50, 22, 59, 64, 20, 67          |

|                      |                               |                                                                                                                     |                                    |
|----------------------|-------------------------------|---------------------------------------------------------------------------------------------------------------------|------------------------------------|
|                      |                               | VM or the combination of VM together with the examination of glass mounted specimens by microscope                  | 42                                 |
|                      |                               | VM use increased the level of subject interest in students                                                          | 35, 39, 53, 54, 22, 55, 60, 66     |
|                      |                               | VM reported as the preferred method for learning                                                                    | 42, 52, 63, 67                     |
|                      |                               | Positive perception and improved student satisfaction                                                               | 34, 36, 55                         |
|                      |                               | The knowledge acquisition on using VM was comparable to the LM                                                      | 33, 42, 44, 50, 57, 61, 64, 20, 65 |
| <b>Disadvantages</b> |                               |                                                                                                                     |                                    |
|                      | Technical implication         | Technical/internet issues while accessing the slides                                                                | 33, 38, 44, 22, 57                 |
|                      | Absence of interaction        | Impaired social connections                                                                                         | 41, 44, 22                         |
|                      |                               | Absence of specimen handling experience/training issues                                                             | 41, 44, 67                         |
|                      |                               | Inadequate feedback from the expert/faculty                                                                         | 41, 44                             |
|                      | No academic score improvement |                                                                                                                     | 65                                 |
|                      |                               | Further research needed to enhance understanding impact of such technologies and for educational policy formulation | 51, 52                             |
